# Supplementary material for: MITF -High and MITF -Low Cells and a Novel Subpopulation Expressing Genes of Both Cell States Contribute to Intra- and Intertumoral Heterogeneity of Primary Melanoma
Source: Oxford University Press journal article supplement (doi:10.1158/1078-0432.ccr-17-0010), 2017-08-28
Supplement: 10780432ccr170010-sup-176887_2_supp_4215394_ccqjzb.xlsx [file 10780432ccr170010-sup-176887_2_supp_4215394_ccqjzb.xlsx]

## Sheet: Table S1
Gene Symbol	Gene Title	sequence forward 5'-3'		sequence reverse 5'-3'
ABCB5	ATP-binding cassette, sub-family B (MDR/TAP), member 5	TGAGAAAGGAAGCAGTTGGATCT		CCATTGACCAGTGATGCCAG
ABCC2	ATP-Binding Cassette, Sub-Family C (CFTR/MRP), Member 2	GCCAACTTGTGGCTGTGATAGG		ATCCAGGACTGCTGTGGGACAT
ACP5	acid phosphatase 5, tartrate resistant	CATGACCACCTTGGCAATGTCTC		CTGTGGGATCTTGAAGTGCAGG
ADAM12	ADAM metallopeptidase domain 12	ATGGCATCTGCCAGACTCACGA		GGAACTCTTCGAGACTTTGCCAC
ADCY2	adenylate cyclase 2 (brain)	AATCAGGTGGCGATTCTGCGTG		AGTTTACCCGCAGGAACACGGA
APOE	apolipoprotein E	GGGTCGCTTTTGGGATTACCTG		CAACTCCTTCATGGTCTCGTCC
ASAH1	N-acylsphingosine amidohydrolase (acid ceramidase) 1	CTTTGCTGGCTATGTGGGCATG		TGAGGAACCCTATCCACATGGC
ASPHD1	Aspartate Beta-Hydroxylase Domain Containing 1	TATGAGTGCCAACACCTTCGGC		CTCACAGCCAGGAGGGATCTTT
BAP1	BRCA1 Associated Protein-1 (Ubiquitin Carboxy-Terminal Hydrolase)	GAGGATGACGTGCAGAACACCA		CTCAGCCAAGACGTTGATGGTG
BIRC3	baculoviral IAP repeat-containing 3	GCTTTTGCTGTGATGGTGGACTC		CTTGACGGATGAACTCCTGTCC
BIRC7	baculoviral IAP repeat-containing 7	TGTCCACAGTGTGCAGGAGACT		GGCACTTTCAGACTGGACCTCT
BPTF	Bromodomain PHD Finger Transcription Factor	GGAGAGATGTTGGTCCTTATGGC		CTTTCCTCTGAGGTGTAGGCGT
BRAF	B-Raf Proto-Oncogene, Serine/Threonine Kinase	AACGAGACCGATCCTCATCAGC		GGTAGCAGACAAACCTGTGGTTG
C21orf91	chromosome 21 open reading frame 91	GGTGAGGTAGAGCAACTGAATGC		GAAGCTGTTCGATGGCAACGTG
CA8	carbonic anhydrase VIII1	GAAGATACCGTCGCCTTCCC		AACACCAGACCCCACTCAAC
CAPN3	calpain 3, (p94)	ACCAGGTCACTGAGGATGGAGA		GACACTGTCCAGGTCTGAAGCT
CCL20	chemokine (C-C motif) ligand 20	AGTGCTGCTACTCCACCTCT		GGTCTGTGTATCCAAGACAGCA
CCNA1	cyclin-dependant A1	ACATTACAGATGATACCTACACCAAG		CTTTGTCCCGTGACTGTGTAGAGTG
CCNB1	cyclin-dependant B1	CGGGAAGTCACTGGAAACAT		AAACATGGCAGTGACACCAA
CCND1	cyclin-dependant 1	GTGCTGCGAAGTGGAAACC		ATCCAGGTGGCGACGATCT
CCNE	cyclin-dependant E	TGAAGTGGTTAAGAAAGCCTCAG		GAAGAAATCATGCACAGCATAGC
CD2	CD2 Molecule	GTCAGCAAGGAATCCAGTGTCG		AACGAGCAGTGCCACAAAGACC
CD24	CD24 Molecule	GTCAGCAAGGAATCCAGTGTCG		AACGAGCAGTGCCACAAAGACC
CD6	CD6 Molecule	TCCTGGCGGTTCAACAACTCCA		GTGACTGTCTGAACACTTGCAGG
CD7	CD7 Molecule	TGTCGGACACTGGCACCTACAC		TCCGAGCATCTGTGCCATCCTT
CD8	CD8 Molecule	TGGCTCTGATGAGGACGACTGT		CACACTCTGAGCATCTTCCTGG
CDH1	cadherin 1, type 1, E-cadherin (epithelial)	AAAGGCCCATTTTCCTAAAAAACCT		TGCGTTCTCTATCCAGAGGCT
CDH2	cadherin 2, N-cadherin	TGCGGTACAGTGTAACTGGG		GAAACCGGGCTATCTGCTCG
CDH3	Cadherin 3, Type 1, P-Cadherin (Placental)	CAGGTGCTGAACATCACGGACA		CTTCAGGGACAAGACCACTGTG
CDH7	Cadherin 7, Type 2	GAGCCATCCAATGGACACCAGT		GAAGCCGTTTCTCCTGGTCAGT
CDK14	cyclin-dependent kinase 14	CCATACCAAGGAGACGCTGACA		AGACAGACCTCGCAGCAACTGA
CDK2	cyclin-dependent kinase 2	ATGGATGCCTCTGCTCTCACTG		CCCGATGAGAATGGCAGAAAGC
CDK4	Cyclin-Dependent Kinase 4	CCATCAGCACAGTTCGTGAGGT		TCAGTTCGGGATGTGGCACAGA
CDK5R1	Cyclin-Dependent Kinase 5, Regulatory Subunit 1	TCATCTCCGTGCTGCCTTGGAA		CTCATTGTTGAGGTGCGTGATGT
CDKN1A	cyclin-dependent kinase inhibitor 1A	AGGTGGACCTGGAGACTCTCAG		TCCTCTTGGAGAAGATCAGCCG
CDKN1B	cyclin-dependent kinase inhibitor 1B	CCGGCTAACTCTGAGGACAC		TTGCAGGTCGCTTCCTTATT
CDKN1C	cyclin-dependent kinase inhibitor 1C	TTAGGAGCTTCAGCATCAGT		GTGGTGGACTCTTCTGCGTC
CDKN2A	cyclin-dependent kinase inhibitor A2	CTTCCTGGACACGCTGGT		GCAGGTACCGTGCGACAT
CEACAM1	carcinoembryonic antigen-related cell adhesion molecule 1	CACGCCAATAACTCAGTCACTGG		TTGTGGAGCAGGTCAGGTTCAC
COL13A1	collagen, type XIII, alpha 1	TGGAGAACAGGGACCAGATGGC		GATCTCCTGGAGAGCCTCATTG
CXCL2	chemokine (C-X-C Motif) Ligand 2	GTGGCTGTTCCTGGGGG		ACATTAGGCGCAATCCAGGT
CXCR4	Chemokine (C-X-C Motif) Receptor 4	CTCCTCTTTGTCATCACGCTTCC		GGATGAGGACACTGCTGTAGAG
CYR61	cysteine-rich, angiogenic inducer, 61	GGAAAAGGCAGCTCACTGAAGC		GGAGATACCAGTTCCACAGGTC
DAB1	disabled-1	TACCTTTCGGCACTGCTGCTGT		TGACCATCTGCTGTTGGACGAG
DAPK1	death-associated protein kinase 1	TTGCACAACAGCTACACAGC		ATAGTC CCACTACTCAGGTC
DAPL1	Death Associated Protein-Like 1	AGAAATTGGCACCTTGGAAAGACA		GCTTCTCCAGTGCGTCATTCAG
DCT	Dopachrome Tautomerase	CTCAGACCAACTTGGCTACAGC		CAACCAAAGCCACCAGTGTTCC
DKK3	dickkopf homolog 3	GTGCATCATCGACGAGGACTGT		TGGTCTCCACAGCACTCACTGT
DLGAP4	Discs, Large (Drosophila) Homolog-Associated Protein 4	CCTCAGCAATAGTCGCACGCTT		ACTGCTCTGGACTGTGACTGAG
DPYD	dihydropyrimidine dehydrogenase	GTGGTGATGTCGTTGGTTTGGC		GTTCAGGCTTGGCAGAAACGGA
EFEMP1	EGF-containing fibulin-like extracellular matrix protein 1	GACGCACAACTGTAGAGCAGAC		GAGCCTGGTGTATTCACGCATC
EGF	epidermal growth factor	GGGATACGCCCTAAGTCGAG		GGGCACGTGCAGTAATAGGA
EGFR	epidermal growth factor receptor	AACACCCTGGTCTGGAAGTACG		TCGTTGGACAGCCTTCAAGACC
EGR1	epidermal growth receptor 1	AGCAGCACCTTCAACCCTCAGG		GAGTGGTTTGGCTGGGGTAACT
ETS1	V-Ets Avian Erythroblastosis Virus E26 Oncogene Homolog 1	GAGTCAACCCAGCCTATCCAGA		GAGCGTCTGATAGGACTCTGTG
FAM174B	family with sequence similarity 174, member B	TTTACCACCCTCCTCATCGCCT		CGAATACTGTGGAGTCCTCATCT
FGF2	fibroblast growth factor 2 (basic)	AGCGGCTGTACTGCAAAAACGG		CCTTTGATAGACACAACTCCTCTC
FOXD1	forkhead box D1	CCCTGTCCAGTGTCGAGAAC		AGCCGGGATTCCTACCTTCT
FST	Follistatin	AGCAGCCAGAACTGGAAGTCCA		CCGATTACAGGTCACACAGTAGG
FZD2	frizzled homolog 2 (Drosophila)	TCGTGTACCTGTTCATCGGCAC		CTGTGTAGAGCACGGAGAAGAC
GLI2	glioma-associated oncogene family Zinc Finger 2	GTCAGAGCCATCAAGACCGAGA		GCATCTCCACGCCACTGTCATT
GNPTAB	N-acetylglucosamine-1-phosphate transferase, alpha and beta subunits	ATTCAGCCTGCGATTGGGATGG		TATTCCTCCACCAAACTGCCAGG
GPR143	G protein-coupled receptor 143	AGGAGTGAGCACAAAAGCAG		TGGGAATCTTGTGGCCAGTTC
GYG2	glycogenin 2	TGGACGGTCTACCAGAACAACG		CTCCAACACCAGAGGCTGAATC
HERC2	HECT and RLD Domain containing E3 ubiquitin Proetein Ligase 2	AGACACGGTGTCCGACGAGTAT		TCTCCGTCACAACAGCACCAGT
HPS4	Hermansky-Pudlak syndrome 4	AGAAGTCGCAGGTACCCAG		TCCAGTTCAAACATCAGTGCC
HS3ST3A1	heparan sulfate (glucosamine) 3-O-sulfotransferase 3A1	TTCTTCGACCGCAGCTACGACA		GCGTGACGAAGTAACTGGGCG
IL8	interleukin 8	TGAAGATTGGCTGATCTTAGCCTT		TCGGTGGAGTTTGGAGTTTGA
INHA	Inhibin Alpha Chain	TCCCAAGCCATCCTTTTCCCAG		TCACCTGGCGGCTGCGTGTAT
INPP4B	inositol polyphosphate-4-phosphatase, type II, 105kDa	GATGCCATTCCCTCTCACCCAA		TTGGCTCGGTTCACCACTTCTC
IRF4	interferon regulatory factor 4	TGACAACGCCTTACCCTTCG		GACGTAGTCCCTCCAGCTTC
ITGA2	integrin, alpha 2	TTGCGTGTGGACATCAGTCTGG		GCTGGTATTTGTCGGACATCTAG
ITGA3	integrin, alpha 3	GCCTGACAACAAGTGTGAGAGC		GGTGTTCGTCACGTTGATGCTC
ITGA4	integrin, alpha 4	GCATACAGGTGTCCAGCAGAGA		AGGACCAAGGTGGTAAGCAGCT
ITGA5	integrin, alpha 5	GCCTTCTGCCTTGGTCCATT		GATGCCCTACCGAATCCTGC
ITGA8	integrin, alpha 8	AACTGGGAACCAGAAGAGGAGC		ACCTCCAGGATGGTGTCACTGA
ITGB3	integrin, beta 3	CATGGATTCCAGCAATGTCCTCC		TTGAGGCAGGTGGCATTGAAGG
ITK	IL2-Inducible T-Cell Kinase	GAAGTGGAGGTGCTGTTCTCAG		CTTCAGGTTCCCAAAGTGGTCG
IVNS1ABP	influenza virus NS1A binding protein	GGAGACAGTCTGGAAGAGCTGA		CATCACTGCCAAACACCTCAGC
JUNB	Jun B Proto-Oncogene	CGATCTGCACAAGATGAACCACG		CTGCTGAGGTTGGTGTAAACGG
KAZN	kazrin	CCAGAGCCAAAGAAGCCTTGCA		CTCTCCAGTGTGGCATACAGCT
KCNMA1	potassium large conductance calcium-activated channel M alpha 1	TATCTCTCCAGTGCCTTCGTGG		CTCTCTCGGTTGGCAGACTTGT
KIT	V-Kit Hardy-Zuckerman 4 Feline Sarcoma Viral Oncogene Homolog	CACCGAAGGAGGCACTTACACA		TGCCATTCACGAGCCTGTCGTA
KRAS	Kirsten Rat Sarcoma Viral Oncogene Homolog	CAGTAGACACAAAACAGGCTCAG		TGTCGGATCTCCCTCACCAATG
KRT14	Keratin 14, Type I	TGCCGAGGAATGGTTCTTCACC		GCAGCTCAATCTCCAGGTTCTG
KRT16	Keratin 16, Type I	CTACCTGAGGAAGAACCACGAG		CTCGTACTGGTCACGCATCTCA
KRT17	Keratin 17, Type I	ATCCTGCTGGATGTGAAGACGC		TCCACAATGGTACGCACCTGAC
KRT78	Keratin 78, Type II	CTCTGGATGCTGAGTTGAAGGC		CTCCAACTCCATCTTGCTCAGG
KRT80	Keratin 80, Type II	CTCAATGTGCGCATCCAGAAGC		TTGGTCTTGGCATCCTGGAAGG
LCK	LCK Proto-Oncogene, Src Family Tyrosine Kinase	AACACTCACGGCTCCTTCCTCA		GTAGAAGCCACCGTTGTCCAGA
LOXL2	lysyl oxidase-like 2	CCCTGGGGAGAGGACATACA		ATGGAGAATGGCCAGTAGCG
MBP	myelin basic protein	AGGATTTGGCTACGGAGGCAGA		GGTTTTCAGCGTCTAGCCATGG
MET	MNNG HOS Transforming gene	AGCGTCAAACAGAGGACCT		GCAGTGAACCTCCGACTGTATG
MICAL1	microtubule associated monoxygenase, calponin and LIM domain containing 1	AGGACGACACCCACTACTTTG		CAGCCGATTGGTGTCTGGC
MITF	microphthalmia-associated transcription factor	GCCAGGCTGGTTTGGACAT		AAACCCACCAAGTACCAC
MKI67	Marker Of Proliferation Ki-67	GAAAGAGTGGCAACCTGCCTTC		GCACCAAGTTTTACTACATCTGCC
MLANA	melan-A	TGCCCACAAGAAGGGTTTGA		TAAGCAGGTGGAGCATTGGG
MMP2	Matrix Metallopeptidase 2	AGCGAGTGGATGCCGCCTTTAA		CATTCCAGGCATCTGCGATGAG
MYO1D	myosin ID	TTTGCCTTCCGCCAGACATACG		CAGCCTCTTTGTCTGAAGGAAGG
MYOF	myoferlin	CTGGTGGGGAAGTGGAAGATT		CGTTGGAACAAAGCCTACCT
NANOG	homeobox transcription factor Nanog	AACCAAAGGATGAAGTGCAAGCGG		TCCAAGTTGGGTTGGTCCAAGTCT
NF1	Neurofibromin 1	GCCTTGAGGAAAACCAGCGGAA		TCCTACTGCACCGATGCTGTTC
NKD2	naked cuticle 2	CTCCGTGTGAAGCTAACCGT		TTCACCCTCCATCCTGCAAC
NR4A3	nuclear receptor subfamily 4, group A, member 3	AGCGCGCAAGATACCCTC		CCGCATAACTGGAACCTGGA
NRAS	Neuroblastoma RAS Viral (V-Ras) Oncogene Homolog	GAAACCTCAGCCAAGACCAGAC		GGCAATCCCATACAACCCTGAG
NRP1	neuropilin 1	AACAACGGCTCGGACTGGAAGA		GGTAGATCCTGATGAATCGCGTG
NTM	neurotrimin	AACAACGGCTCGGACTGGAAGA		GGTAGATCCTGATGAATCGCGTG
NUAK1	NUAK family, SNF1-like kinase, 1	CTCATTCGGCAAATCAGCAGCG		CACCAGTGGTTGGCAATGTCCT
OCA2	oculocutaneous albinism II	AGGAGAAGCGAGCACTCAGTGA		CACCTGGGTTTCTACACTTCCG
OSBP2	oxysterol binding protein 2	CAGCCTTAACCTCTGGAGCATC		TGGTACTCCAGGTCCTCTGTCA
OSMR	oncostatin M receptor	CAGGTGTTCCTACCAAATCTGCG		AATCCACCCTCTGTGCCTGCAA
PAX3	Paired Box 3	GGCTTTCAACCATCTCATTCCCG		GTTGAGGTCTGTGAACGGTGCT
PDGFC	platelet derived growth factor C	GGGAACTGTGCCTGTTGTCT		GACACCGGTCTTTGGTCTCA
PMEL	Premelanosome Protein	CTGCCTCAATGTGTCTCTGGCT		CAAGGACCACAGCCATCAACAC
PHACTR1	phosphatase and actin regulator 1	TCAAGAGGAGGCTAACCCGA		TCCACGTAGTCACTGAAGCG
PIR	pirin (iron-binding nuclear protein)	TACCGCAGCGTGAGTACCTG		AGTGTTCTGATGCTGAGCTGT
PLXNC1	plexin C1	TTCCTGCTACCACCTGGATCAG		CCGCAGTAAGTCGCCACACAAT
POU3F2	POU Class 3 Homeobox	GTGTTCTCGCAGACCACCATCT		GCTGCGATCTTGTCTATGCTCG
POU5F1	POU domain, class 5, transcription factor 1	AGCACGAGTGGAAAGCAACT		TCTAGCTCCTTCTGCAGGG
PTEN	Phosphatase And Tensin Homolog	TGAGTTCCCTCAGCCGTTACCT		GAGGTTTCCTCTGGTCCTGGTA
RAB27A	RAB27A, member RAS oncogene family	ACAACAGTGGGCATTGATTTCA		AAGCTACGAAACCTCTCGTGC
RAB38	RAB38, member RAS oncogene family	CCTCAAGATGGACCAGTTCTGC		CGGCTCAATAGACTCCATTAGGT
RELB	reticuloendotheliosis viral oncogene homolog B	TGTGGTGAGGATCTGCTTCCAG		TCGGCAAATCCGCAGCTCTGAT
RGS20	regulator of G-protein signaling 20	CTTCCCACGAACTCAGAGCAGA		TCCTTCCTGCTGGAGTGACCAT
RGS5	regulator of G-protein signaling 5	GAAGCCAGACTCAGTTGGTGAC		GGAGTTTGTCCAGGGAATCACG
RHOQ	ras homolog gene family, member Q	GGGGCAAGCAGTACCTCCTA		TGAGGCTGGATTTACCACCG
RPLPO	Ribosomal Protein, Large, P0	TTCATTGTGGGAGCAGAC		CAGCAGTTTCTCCAGAGC
S100A1	S100 Calcium Binding Protein A1	GTACAAGCTGAGCAAGAAGGAGC		CTCGTCTAGCTCCTTCATCACC
S100A2	S100 calcium binding protein A2	TGCCAAGAGGGCGACAAGTTCA		AAGTCCACCTGCTGGTCACTGT
S100B	S100 Calcium Binding Protein B	GAAGAAATCCGAACTGAAGGAGC		TCCTGGAAGTCACATTCGCCGT
SEMA6A	sema domain, transmembrane domain, and cytoplasmic domain, 6A	ACCTGTATTGCCTCCAGAGACC		CCAGACCATCTGTATTGCCACG
SH3RF1	SH3 Domain Containing Ring Finger 1	CAACTGGCCCCTCGTTTACT		GGTGGTGGAAGAGGAGGATTC
SIRPA	signal-regulatory protein alpha	CGTTCACTCTCAAGTCATCTGCG		GGTGACATTCACCTGGTTCTCTG
SLC22A4	Solute Carrier Family 22, Member 4	TGGACCTGTTCAGGACTCGGAA		TAGGAGCATCCAGAGACAGAGC
SLC45A2	Solute Carrier Family 45 Member 2	CTTTGCATCAGCCACCTCATTGG		TCCAACCTCGACTCCTCTTTCG
SLIT2	slit homolog 2	CAGAGCTTCAGCAACATGACCC		GAAAGCACCTTCAGGCACAACAG
SMARCA4	SWI/SNF Related, Matrix Associated, Actin Dependent Regulator Of Chromatin, Subfamily A, Member 4	AAAACACGGGCTCGAAGAGCGA		TGGAGCTGTTGATTCTGGCTTCC
SNAI1	Snail Family Zinc Finger 1	TGCCCTCAAGATGCACATCCGA		GGGACAGGAGAAGGGCTTCTC
SNAI2	Snail Family Zinc Finger 2	ATCTGCGGCAAGGCGTTTTCCA		GAGCCCTCAGATTTGACCTGTC
SOX10	Sex Determining Region Y-Box 10	ATGAACGCCTTCATGGTGTGGG		CGCTTGTCACTTTCGTTCAGCAG
SOX2	SRY (Sex Determining Region Y)-Box 2	GCTACAGCATGATGCAGGACCA		TCTGCGAGCTGGTCATGGAGTT
SOX9	SRY (Sex Determining Region Y)-Box 9	AGGAAGCTCGCGGACCAGTAC		GGTGGTCCTTCTTGTGCTGCAC
STX7	syntaxin 7	AGAGGTGCACGTTCAGCAAG		TGATGCACAGGGTTTTTCTGG
SYNJ2	synaptojanin 2	TATGGTCGTGCGGAGCTACAAG		GGAGGACACTTCCTGGAAAACC
TCF4	transcription factor 4	GCCTCTTCACAGTAGTGCCATG		GCTGGTTTGGAGGAAGGATAGC
TCL1A	T-Cell Leukemia/Lymphoma 1A	GATACCGATCCTCAGACTCCAG		AAGGAGACAGGTGCTGCCAAGA
TDG	thymine-DNA glycosylase1	GAATGGAAGCGGAGAACGC		TTAGGAGCTTCAGCCATCAGT
TFE3	Transcription Factor Binding To IGHM Enhancer 3	GATCATCAGCCTGGAGTCCAGT		AGCAGATTCCCTGACACAGGCA
TFEB	Transcription factor EB	CCTGGAGATGACCAACAAGCAG		TAGGCAGCTCCTGCTTCACCAC
TFEC	Transcription factor EC	TTAGAGCAGGCTAACAGGCGAC		ATCAACCGTGCCAAGTGAAGCC
TGFA	transforming growth factor alpha	GGTCCGAAAACACTGTGAGTGG		CAAACTCCTCCTCTGGGCTCTT
THBS1	thrombospondin 1	GAATGGACTGTTGATAGCTGCAC		ATGATGGGGCAGGACACCTT
TLE2	transducin-like enhancer of split 2	CTGCCTCCAAATCCTGTGACTC		TGGTGAAGGGACTGGACAGAGT
TLE4	transducin-like enhancer of split 4	GGAAAACCACCAGGAGTTGACC		TGGTCAGCTCTCCGTTCATTCC
TNC	tenascin C	ACCGGTTACCTGCTGGTCTA		AGGAGGTGGTATCTGGACCC
TNFRSF11B	tumor necrosis factor receptor superfamily, member 11b	GGTCTCCTGCTAACTCAGAAAGG		CAGCAAACCTGAAGAATGCCTCC
TNFSF12	Tumor Necrosis Factor (Ligand) Superfamily, Member 12	CAAAGACAAGCACATCCTCGCC		GCCACATAGTGCGTGTTGAGCA
TP53	Tumor Protein P53	CCTCAGCATCTTATCCGAGTGG		TGGATGGTGGTACAGTCAGAGC
TPBG	trophoblast glycoprotein	CAAGGTCCTTCACAATGGCACC		CCTCTGTTTCCTTGAGCCAGGT
TPM1	tropomyosin 1 (alpha)	GGCACCGAAGATGAACTGGACA		GCGTCTGTTCAGAGAAGCTACG
TRPM1	transient receptor potential cation channel, subfamily M, member 1	ACTACGTCATCCTGGTGCGGAT		CTGGCTGAGTTTGCCTGGTTCT
TYR	tyrosinase	GCACAGATGAGTACATGGGAGG		CTGATGGCTGTTGTACTCCTCC
TYRP2	tyrosinase-related protein-2	CTCAGACCAACTTGGCTACAGC		CAACCAAAGCCACCAGTGTTCC
UBB	Ubiquitin B	GCCGCACTCTTTCTGACTACAAC		ACCTCCAGAGTGATGGTCTTGC
USP11	Ubiquitin Specific Peptidase 11	GCTGATGTCTTCAGTCACCGCT		GGAACCACGATGTCCTCTCTTG
USP7	Ubiquitin Specific Peptidase 7	GTCACGATGACGACCTGTCTGT		GTAATCGCTCCACCAACTGCTG
VIM	Vimentin	AGGCAAAGCAGGAGTCCACTGA		ATCTGGCGTTCCAGGGACTCAT
WDR91	WD repeat domain 91	AAACGGGACAGACTGCTCTTGC		CACGCAAGAGACAGGATTCTGG
WNT5A	Wingless-Type MMTV Integration Site Family, Member 5A	TACGAGAGTGCTCGCATCCTCA		TGTCTTCAGGCTACATGAGCCG
YY1	Yin And Yang 1	GGAGGAATACCTGGCATTGACC		CCCTGAACATCTTTGTGCAGCC
ZEB1	zinc finger E-box binding homeobox 1	GGCATACACCTACTCAACTACGG		TGGGCGGTGTAGAATCAGAGTC
ZEB2	Zinc Finger E-Box Binding Homeobox 2	AATGCACAGAGTGTGGCAAGGC		CTGCTGATGTGCGAACTGTAGG
ZFYVE16	zinc finger, FYVE domain containing 16	AAGCTTGAGATTCCCTGGGC		TTCGGCCTCTGATGCTTGTT
